# Supplementary material
Source: publisher site journal article supplement (https://kjim.org/upload/media/kjim-2024-080-Supplementary-Table-1.pdf)
Supplement: Supplementary file 1 [file kjim-2024-080-Supplementary-Table-1.pdf]

**Supplementary Table 1. Laboratory test results for AST, ALT, and hs-CRP**

| Characteristic                                        | Evolocumab group<br>(n = 50) | Non-evolocumab group<br>(n = 45) | <i>p</i> value |
|-------------------------------------------------------|------------------------------|----------------------------------|----------------|
| Baseline                                              |                              |                                  |                |
| AST (50/45)                                           | 37.0 (27.2–64.2)             | 37.0 (27.0–46.0)                 | 0.240          |
| ALT (50/45)                                           | 28.5 (20.0–41.0)             | 24.0 (14.0–32.0)                 | 0.030          |
| AST/ALT abnormality <sup>a)</sup>                     | 29 (58.0)                    | 22 (48.9)                        | 0.415          |
| AST/ALT > 3 times the upper limit of the normal range | 5 (10.0)                     | 3 (6.7)                          | 0.718          |
| Hs-CRP, mg/L (48/43)                                  | 1.3 (0.7–4.0)                | 1.8 (0.6–8.4)                    | 0.575          |
| 1–3 weeks lowest value                                |                              |                                  |                |
| AST (36/43)                                           | 25.5 (19.0–29.0)             | 25.0 (20.0–31.0)                 | 0.756          |
| ALT (36/43)                                           | 31.0 (22.0–48.2)             | 22.0 (15.0–31.0)                 | 0.019          |
| AST/ALT > 3 times the upper limit of the normal range | 1 (2.8)                      | 0 (0.0)                          | 0.456          |
| Hs-CRP, mg/L (26/34)                                  | 1.6 (0.7–5.5)                | 2.2 (0.9–8.8)                    | 0.368          |
| 3–8 weeks lowest value                                |                              |                                  |                |
| AST (45/44)                                           | 27.0 (21.2–33.5)             | 24.5 (18.8–30.5)                 | 0.187          |
| ALT (45/44)                                           | 34.0 (25.0–41.8)             | 26.5 (17.8–35.5)                 | 0.058          |
| AST/ALT > 3 times the upper limit of the normal range | 2 (4.0)                      | 0 (0.0)                          | 0.497          |
| Hs-CRP, mg/L (41/37)                                  | 0.7 (0.6–1.3)                | 0.9 (0.6–3.7)                    | 0.408          |

Values are presented as median (interquartile range) or number (%).

AST, aspartate aminotransferase; ALT, alanine aminotransferase; Hs-CRP, high-sensitivity C-reactive protein.

<sup>a)</sup>AST/ALT abnormality is defined as AST or ALT level more than 40 IU/L.
